# Supplementary material for: Fbxw7/Cdc4 is a p53-dependent, haploinsufficient tumour suppressor gene
Source: Springer Nature journal article supplement (doi:10.1038/nature03155), 2004-12-01
Supplement: nature03155-s4.pdf [file nature03155-s4.pdf]

Supplementary Fig 2a

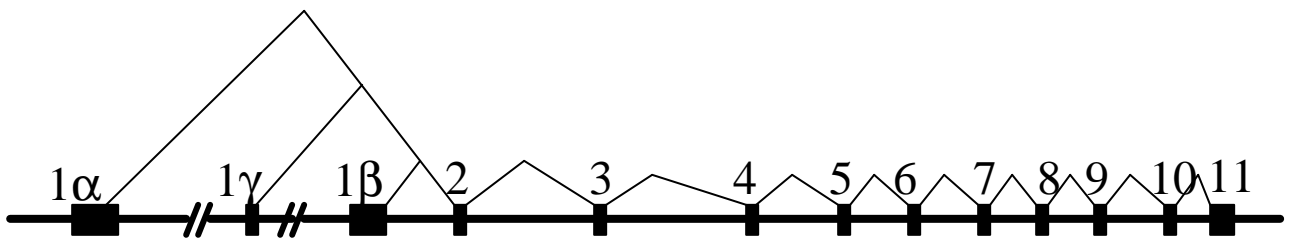

# Supplementary Fig 2b

|                              |                                                                       |     |
|------------------------------|-----------------------------------------------------------------------|-----|
| mFbxw7 $\alpha$              | MNQELLSVGSKRRRTGGSLRGNASSSQVDEGQMNRVVEEDPQQQARHQEEEHTARNGELV          | 60  |
| hFBXW7 $\alpha$              | <u>MNQELLSVGSKRRRTGGSLRGNPSSSQVDEEQMNRVVEEQQQQLRQEEEHTARNGEVV</u>     | 60  |
| mFbxw7 $\alpha$              | GADPRPGDQNDTQQGQVEENNNRFISVDEDEDSSGNQEEQEEDEEHAGEQEEEEEEEEEEEE        | 120 |
| hFBXW7 $\alpha$              | <u>GVEPRPGQNDSSQQGQLEENNNRFISVDEDEDSSGNQEEQEEDEEHAGEQDEEDEEEEE---</u> | 117 |
| mFbxw7 $\beta$               | MRVCPSSVLVLSVCVCWCWGVLPLPPLNLPFLACLMS                                 | 39  |
| hFBXW7 $\beta$               | <u>M--CVPRSGLLILSCICLYCGVLLPVLPLNLPFLTCLMS</u>                        | 37  |
| mFbxw7 $\alpha$              | MDQESDDFDPSDDSSREDEHTHNSVNTNCSSVSDLPALHQLSSPFYTKTTMKRKLHDHGSE         | 180 |
| hFBXW7 $\alpha$              | <u>MDQESDDFDPSDDSSREDEHTHNSVNTNCSSIVDLVPVHQLSSPFYTKTTMKRKLHDHGSE</u>  | 177 |
| mFbxw7 $\beta$               | TLESVTYLPEKGLYCQRLPSSRTHGGTESLKGKNTENMGFYGLTKMIFYKMKRKLHDHGSE         | 99  |
| hFBXW7 $\beta$               | <u>TLESVTYLPEKGLYCQRLPSSRTHGGTESLKGKNTENMGFYGLTKMIFYKMKRKLHDHGSE</u>  | 97  |
| mFbxw7 $\gamma$              | MSKPGKAPVNHGLVPVDLKSADPLPHQTVMKIFSISIMSQGLPFCRRRMKRKLHDHGSE           | 59  |
| hFBXW7 $\gamma$              | <u>MSKPGKPTLNHGLVPVDLKSADPLPHQTVMKIFSISIIAQGLPFCRRRMKRKLHDHGSE</u>    | 59  |
| mFbxw7 $\alpha,\beta,\gamma$ | VRSFSLGKKPCKVSDYTTSTTGLVPCSATPTTFGLDRAANGQGQRRRITSVQPPTGLQEW          |     |
| hFBXW7 $\alpha,\beta,\gamma$ | <u>VRSFSLGKKPCKVSEYTTSTTGLVPCSATPTTFGLDRAANGQGQRRRITSVQPPTGLQEW</u>   |     |
| mFbxw7 $\alpha,\beta,\gamma$ | LKMFQSWSGPEKLLALDELIDSCEPTQVKHMMQVIEPQFQRDFISLLPKELALYVLSFLE          |     |
| hFBXW7 $\alpha,\beta,\gamma$ | <u>LKMFQSWSGPEKLLALDELIDSCEPTQVKHMMQVIEPQFQRDFISLLPKELALYVLSFLE</u>   |     |
|                              | -----F-box--                                                          |     |
| mFbxw7 $\alpha,\beta,\gamma$ | PKDLLQAAQTCRYWRILAEDNLLWREKCKEEGIDEPLHIKRRKIKPGFIHSPWKSAYIR           |     |
| hFBXW7 $\alpha,\beta,\gamma$ | <u>PKDLLQAAQTCRYWRILAEDNLLWREKCKEEGIDEPLHIKRRKVIKPGFIHSPWKSAYIR</u>   |     |
| mFbxw7 $\alpha,\beta,\gamma$ | QHRIDTNWRRGELKSPKVLKGHDDHVITCLQFCGNRIVSGSDDNTLKVWSAVTGKCLRTL          |     |
| hFBXW7 $\alpha,\beta,\gamma$ | <u>QHRIDTNWRRGELKSPKVLKGHDDHVITCLQFCGNRIVSGSDDNTLKVWSAVTGKCLRTL</u>   |     |
|                              | -----WD40 I-----                                                      |     |
| mFbxw7 $\alpha,\beta,\gamma$ | VGHTGGVWSSQMRDNI I ISGSTDRTLKVWNAETGECIHTLYGHTSTVRCMHLHEKRVVSG        |     |
| hFBXW7 $\alpha,\beta,\gamma$ | <u>VGHTGGVWSSQMRDNI I ISGSTDRTLKVWNAETGECIHTLYGHTSTVRCMHLHEKRVVSG</u> |     |
|                              | -----WD40 II-----                                                     |     |
| mFbxw7 $\alpha,\beta,\gamma$ | SRDATLRVWDIETGQCLHVLGMHVAAVRCVQYDGRRVVSGAYDFMVKVWDPETETCLHTL          |     |
| hFBXW7 $\alpha,\beta,\gamma$ | <u>SRDATLRVWDIETGQCLHVLGMHVAAVRCVQYDGRRVVSGAYDFMVKVWDPETETCLHTL</u>   |     |
|                              | -----WD40 IV-----                                                     |     |
| mFbxw7 $\alpha,\beta,\gamma$ | QGHTNRVYSLQFDGIHVVSGSLDTSIRVWDVETGNCIHTLTGHQSLTSGMELKDNILVSG          |     |
| hFBXW7 $\alpha,\beta,\gamma$ | <u>QGHTNRVYSLQFDGIHVVSGSLDTSIRVWDVETGNCIHTLTGHQSLTSGMELKDNILVSG</u>   |     |
|                              | -----WD40 V-----                                                      |     |
| mFbxw7 $\alpha,\beta,\gamma$ | NADSTVKIWDIKTGQCLQTLQGPSKHQS AVTCLQFNKNFVITSSDDGTVKLWDLKTGEFI         |     |
| hFBXW7 $\alpha,\beta,\gamma$ | <u>NADSTVKIWDIKTGQCLQTLQGPSKHQS AVTCLQFNKNFVITSSDDGTVKLWDLKTGEFI</u>  |     |
|                              | -----WD40 VII-----                                                    |     |
| mFbxw7 $\alpha,\beta,\gamma$ | RNLVTLES GSGGVVWRIRASNTKLVCAVSRNGTEETKLLVLD FDFVDMK                   |     |
| hFBXW7 $\alpha,\beta,\gamma$ | <u>RNLVTLES GSGGVVWRIRASNTKLVCAVSRNGTEETKLLVLD FDFVDMK</u>            |     |
