# Supplementary figures and images for: Fbxw7/Cdc4 is a p53-dependent, haploinsufficient tumour suppressor gene
Source: Springer Nature journal article supplement (doi:10.1038/nature03155), 2004-12-01

# Supplementary Fig 1a

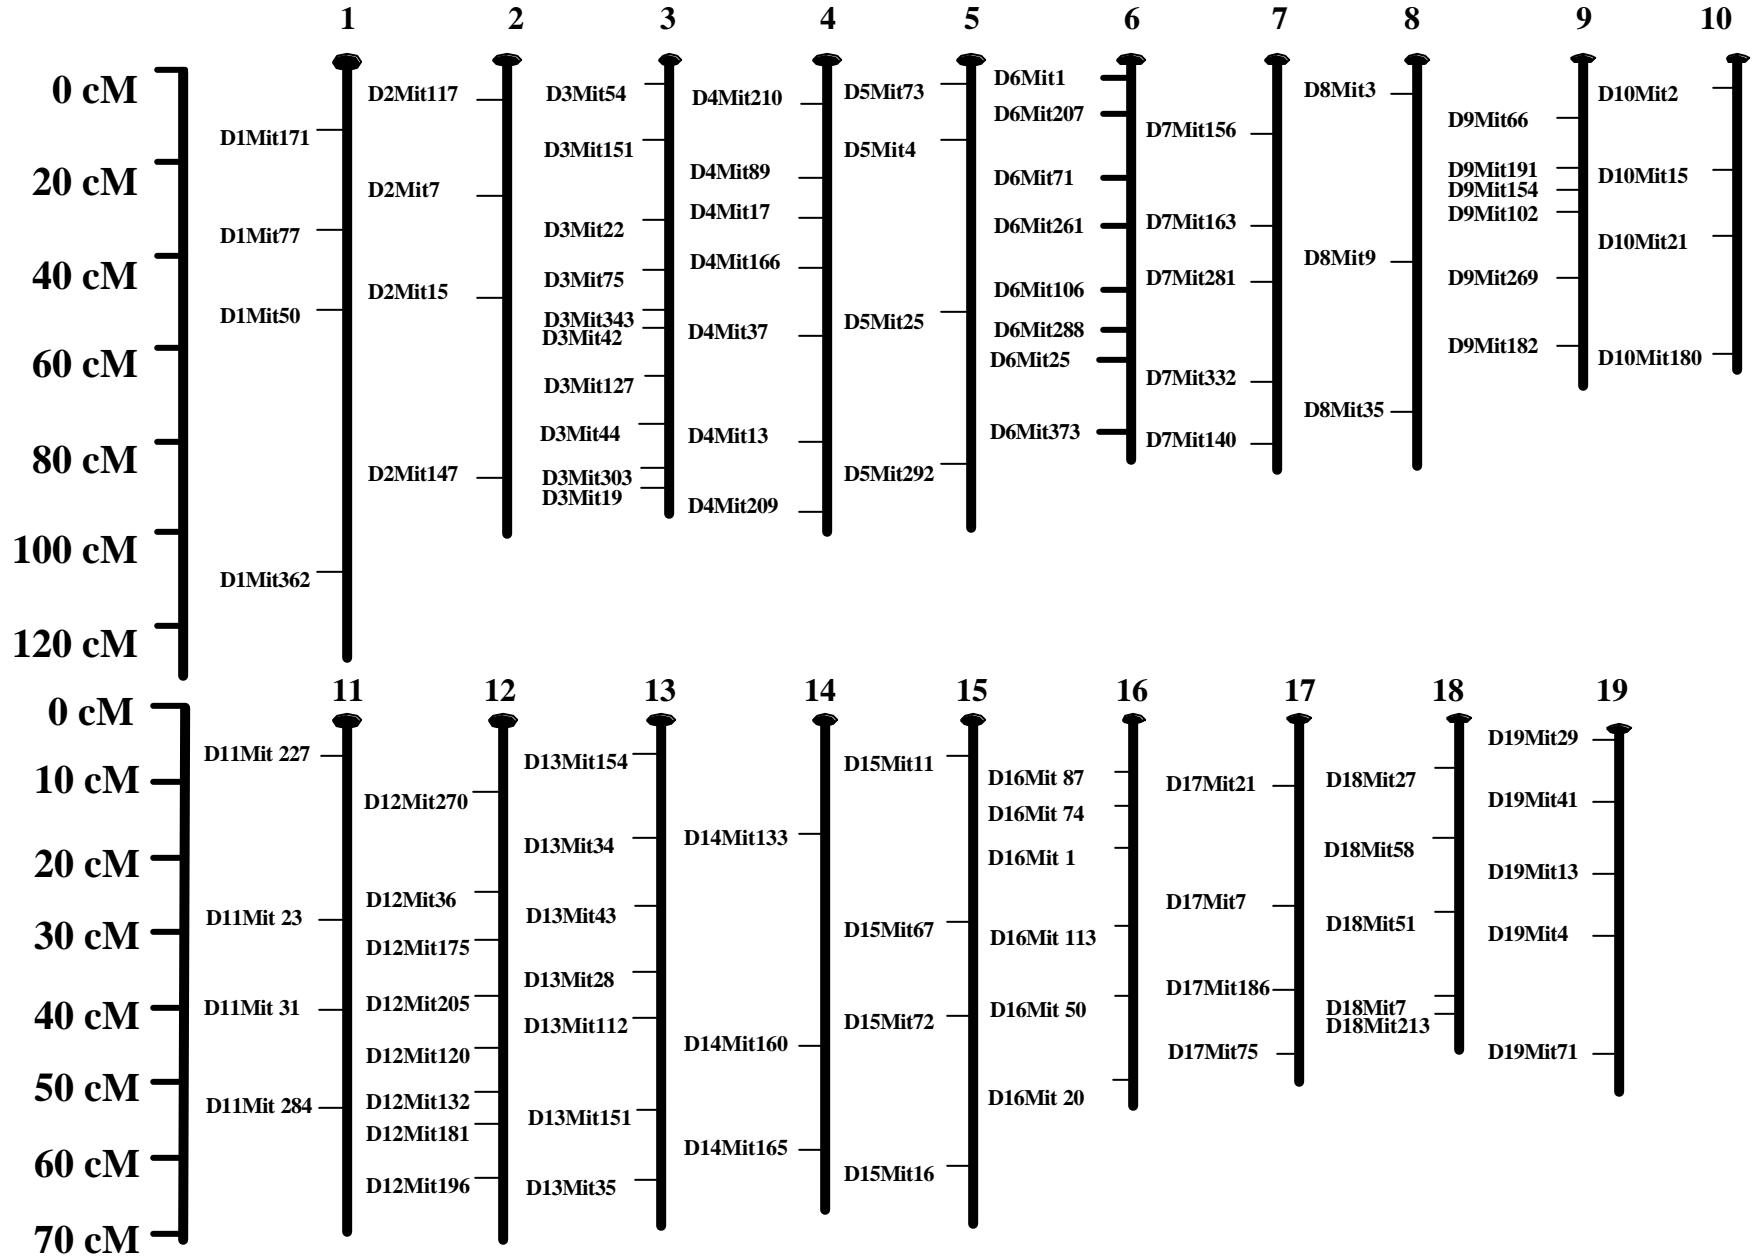

Supplement: nature03155-s2.pdf [file nature03155-s2.pdf]

**Supplementary Fig 1b**

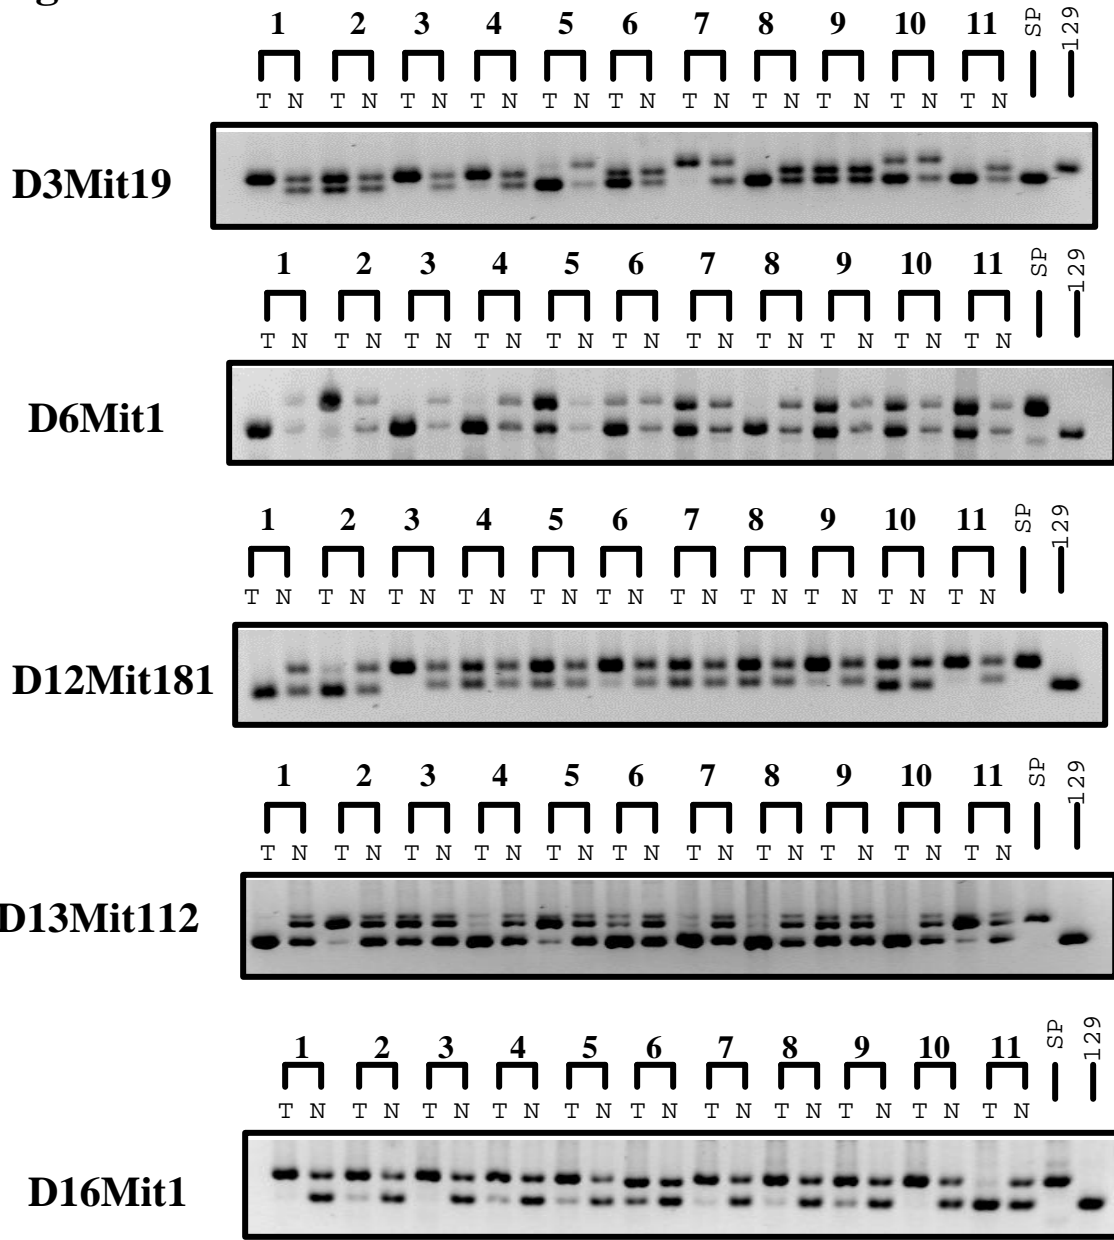

Supplement: nature03155-s3.pdf [file nature03155-s3.pdf]

# Supplementary Figure 3a

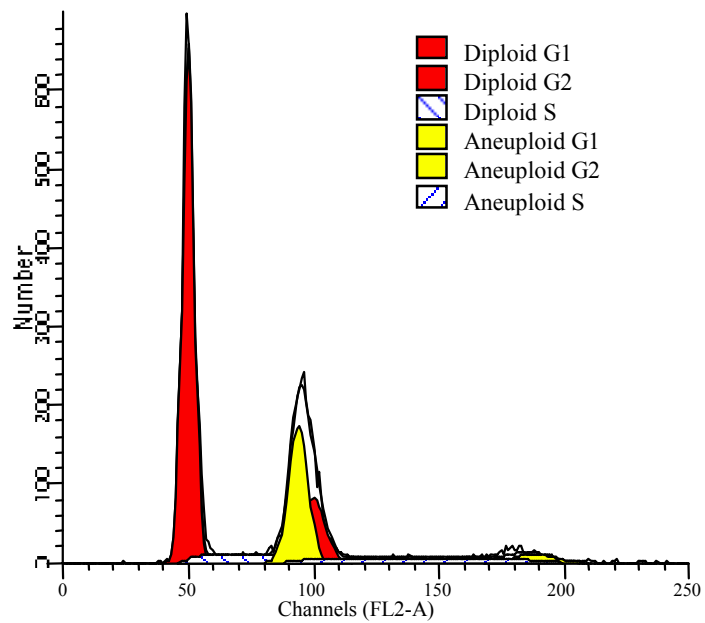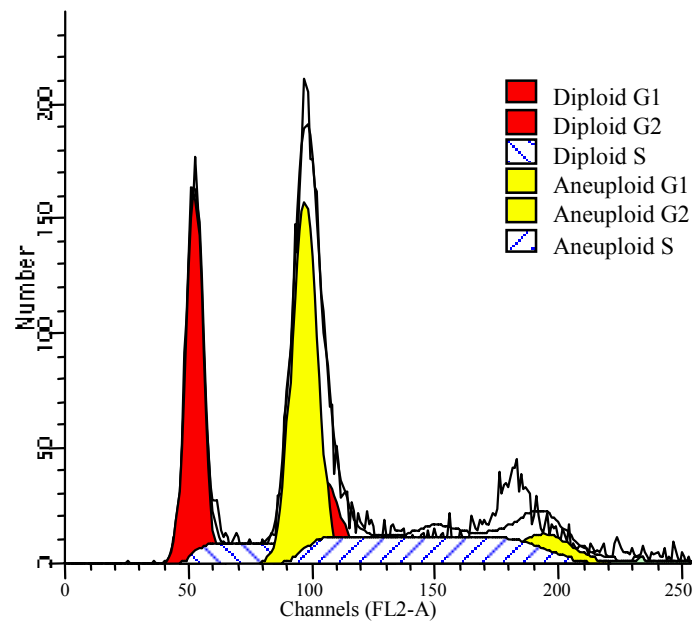

Supplementary Figure 3b

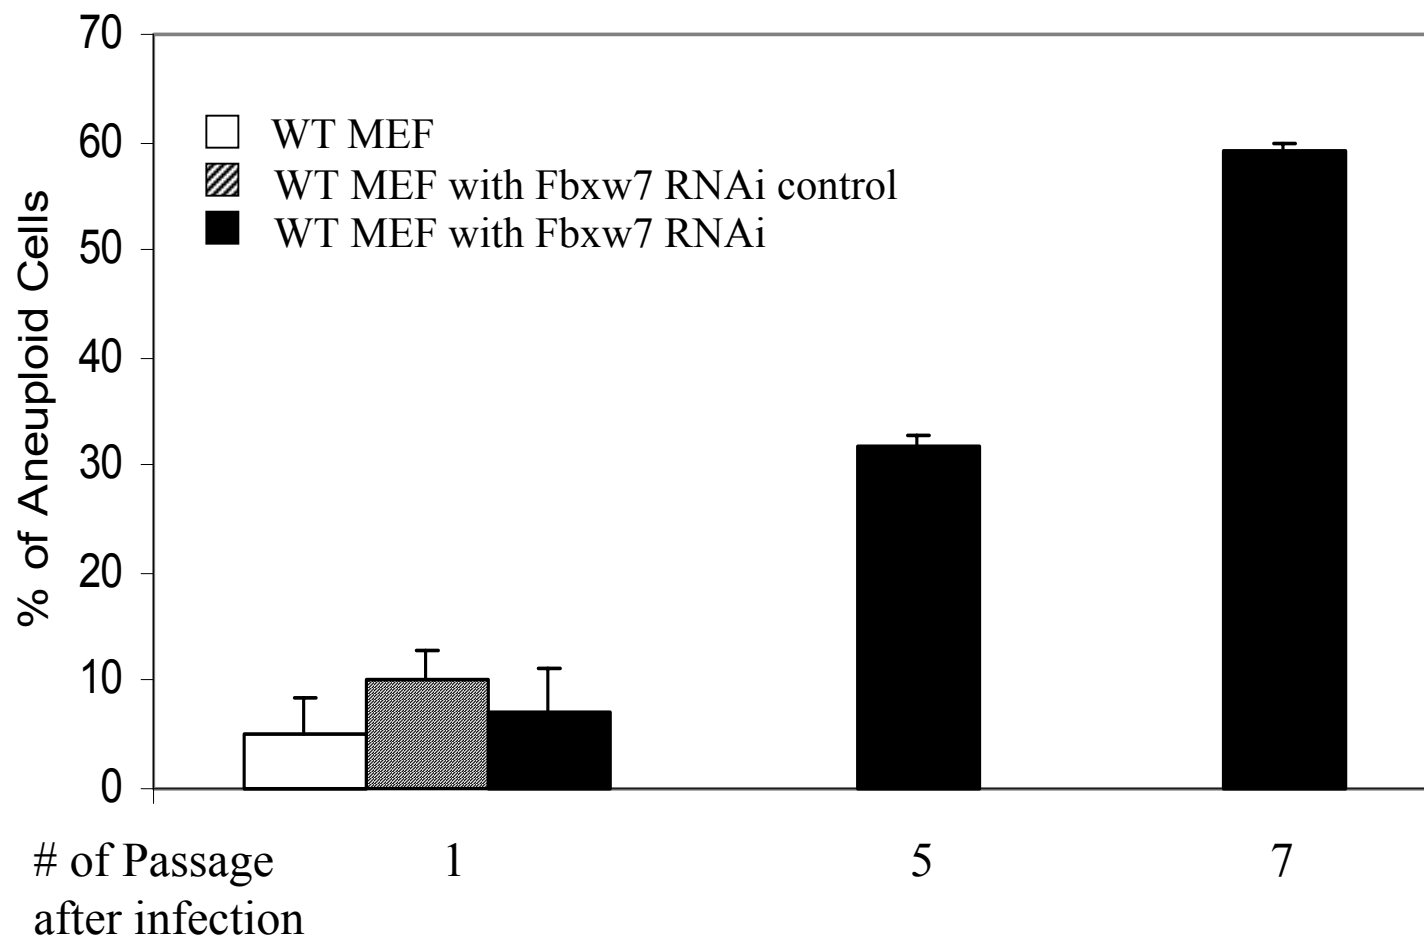

Supplement: nature03155-s5.pdf [file nature03155-s5.pdf]

Supplementary Fig. 5a

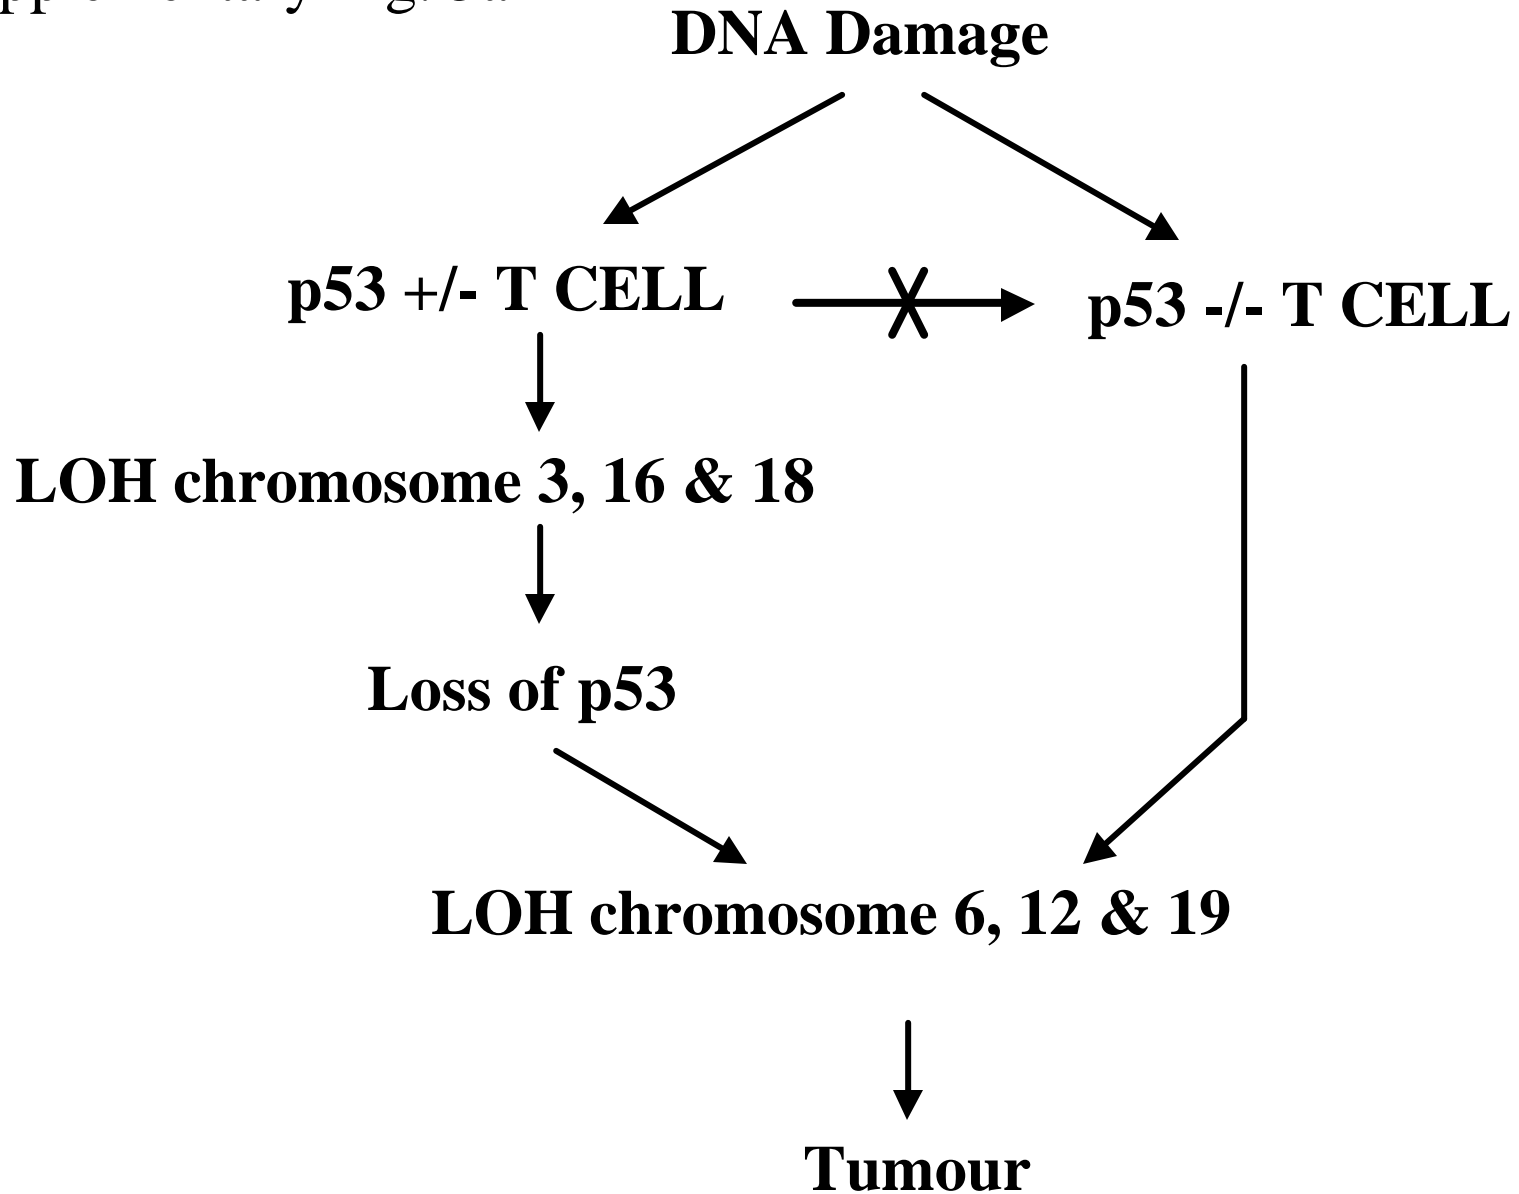

Supplementary Fig. 5b

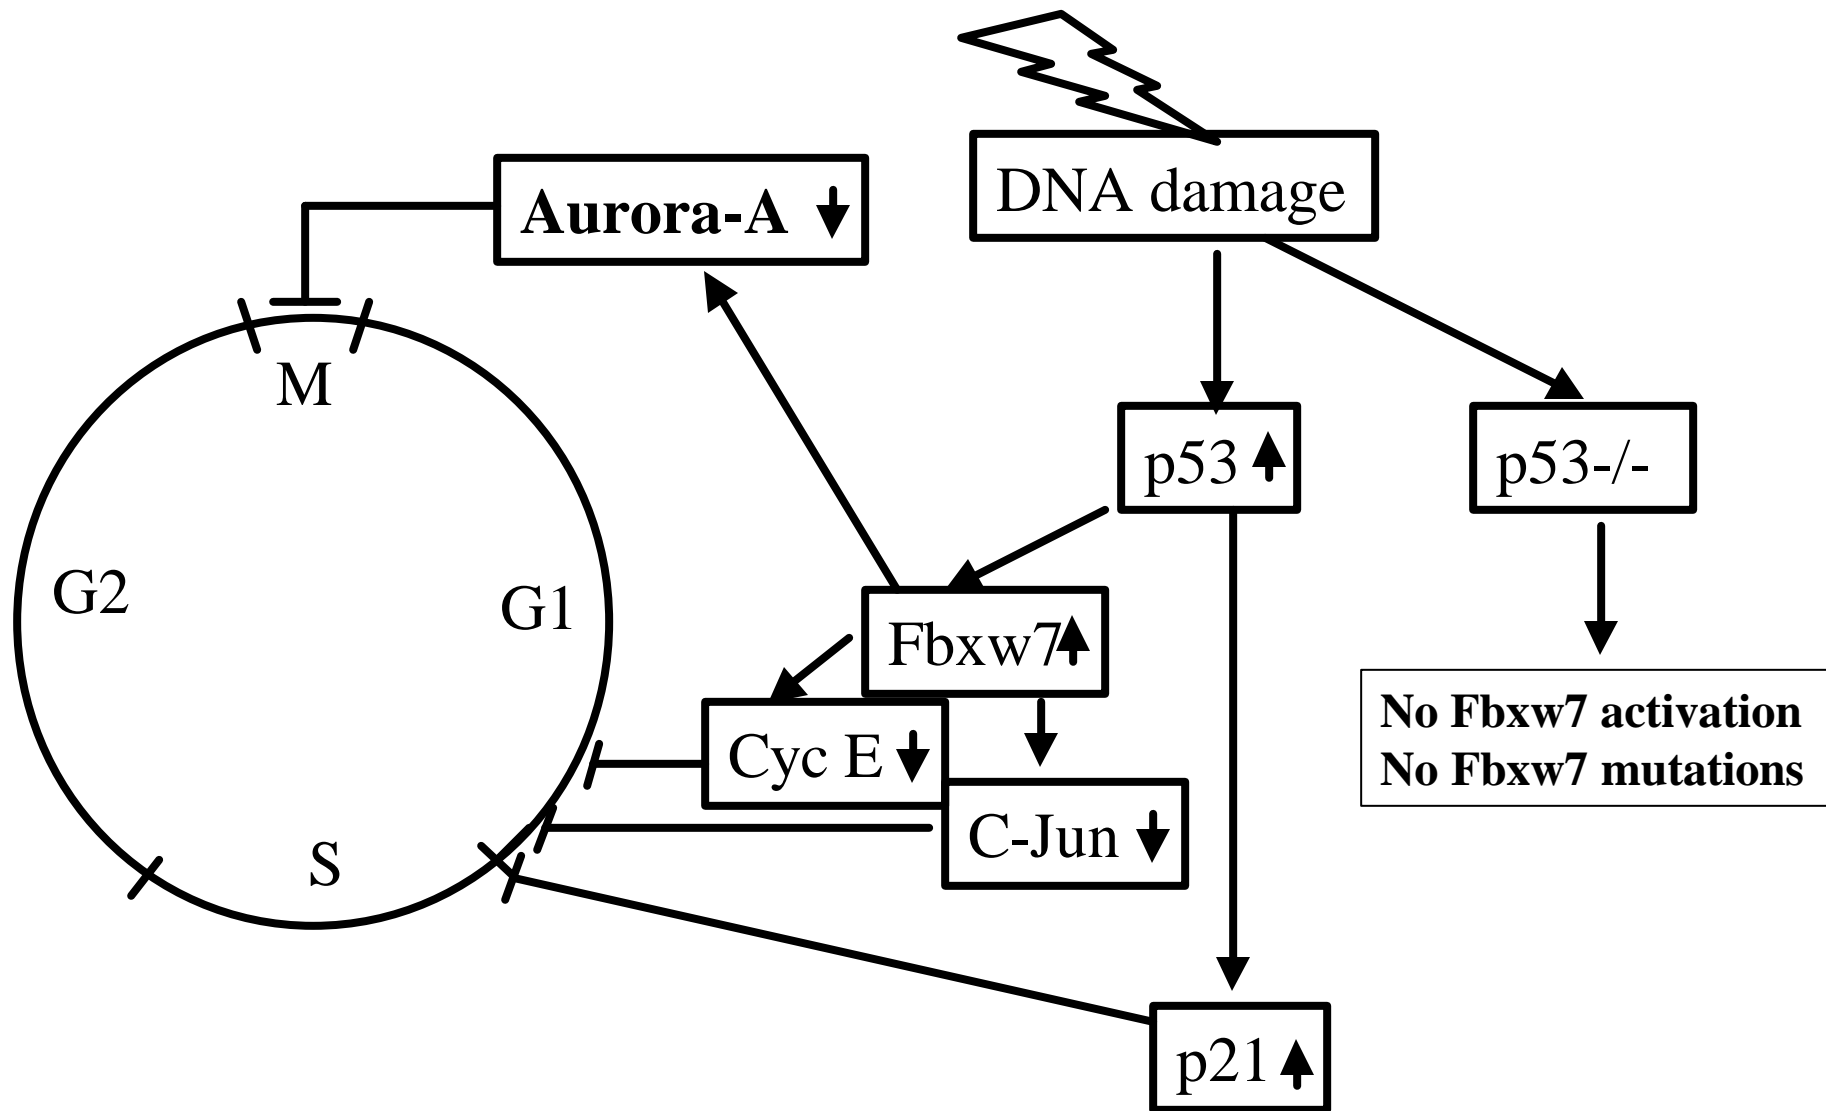

Supplement: nature03155-s7.pdf [file nature03155-s7.pdf]
